# Supplementary material
Source: Royal Society of Chemistry journal article supplement (doi:10.1039/d6ay00620e)
Supplement: d6ay00620e1.pdf [file d6ay00620e1.pdf]

# Application of FT-IR Spectroscopy as a Non-Invasive Multi-Attribute Monitoring Platform for Critical Quality Attributes in Monoclonal Antibodies

*Ameya N. Parkar<sup>1</sup>, Prajakta Dandekar Jain<sup>2\*</sup>, Ratnesh Jain<sup>1\*</sup>*

<sup>1</sup>Department of Biological Sciences and Biotechnology, Institute of Chemical Technology, Mumbai, India.

<sup>2</sup>Department of Pharmaceutical Sciences and Technology, Institute of Chemical Technology, Mumbai, India.

## Supplementary information

|                                                                                                                                                                                        |   |
|----------------------------------------------------------------------------------------------------------------------------------------------------------------------------------------|---|
| Figure 1 Repeatability assessment of FT-IR measurements of IgG1 deamidated showing consistent spectra across repeated acquisitions. ....                                               | 2 |
| Figure 2 Repeatability assessment of FT-IR measurements of IgG1 oxidised showing consistent spectra across repeated acquisitions. ....                                                 | 2 |
| Figure 3 Repeatability assessment of FT-IR measurements of IgG1 glycated showing consistent spectra across repeated acquisitions. ....                                                 | 3 |
| Figure 4: PCA loading plots (PC1 and PC2) correlated with the reference FT-IR spectrum of IgG1 samples, highlighting the spectral regions contributing to sample differentiation. .... | 4 |
| Figure 5: Scree plot illustrating the variance explained by principal component obtained from PCA analysis of FT-IR spectra of non-stressed and stressed IgG1 samples. ....            | 5 |

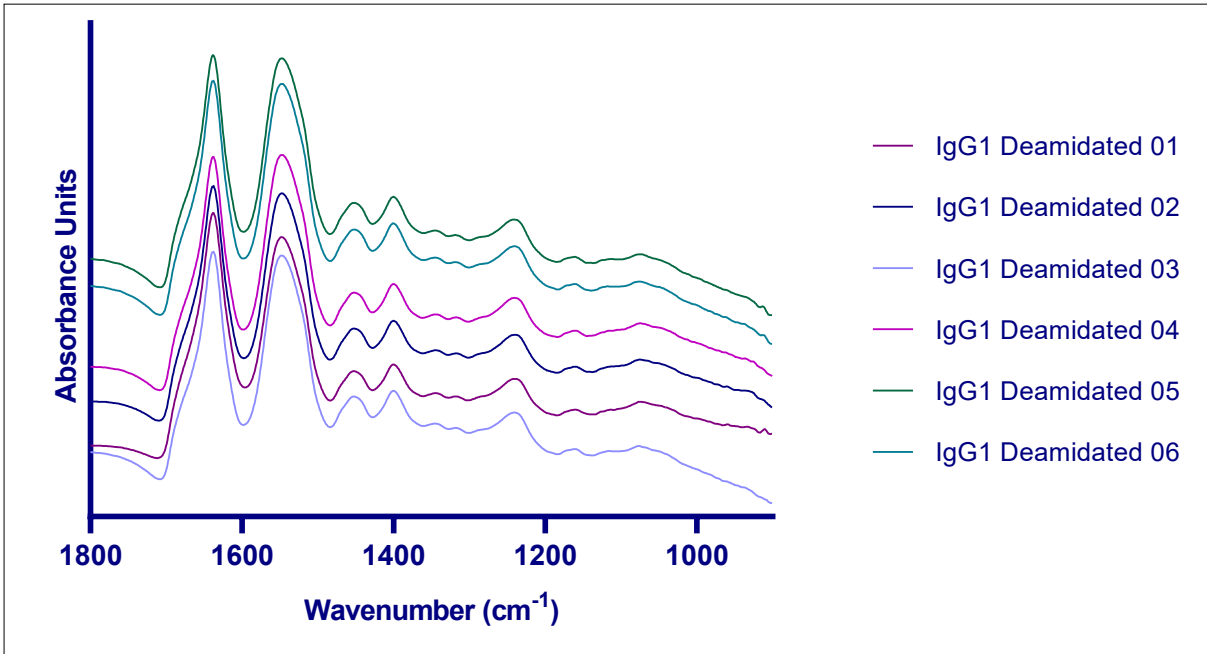

Figure 1 Repeatability assessment of FT-IR measurements of IgG1 deamidated showing consistent spectra across repeated acquisitions.

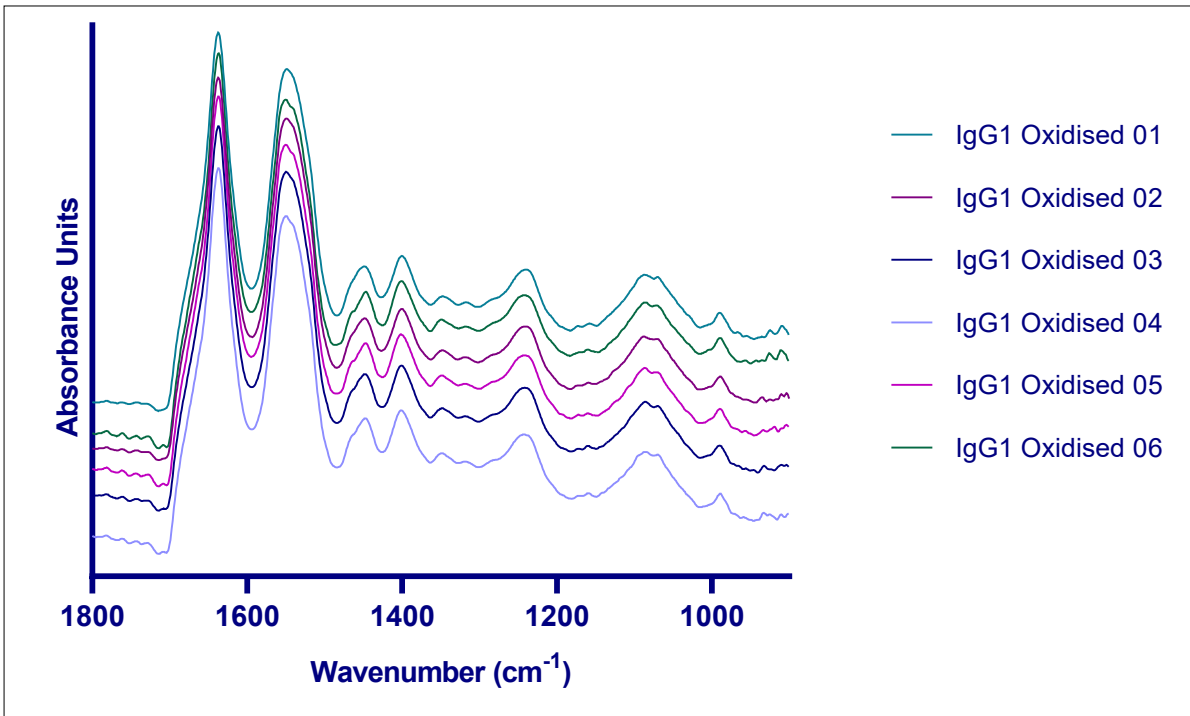

Figure 2 Repeatability assessment of FT-IR measurements of IgG1 oxidised showing consistent spectra across repeated acquisitions.

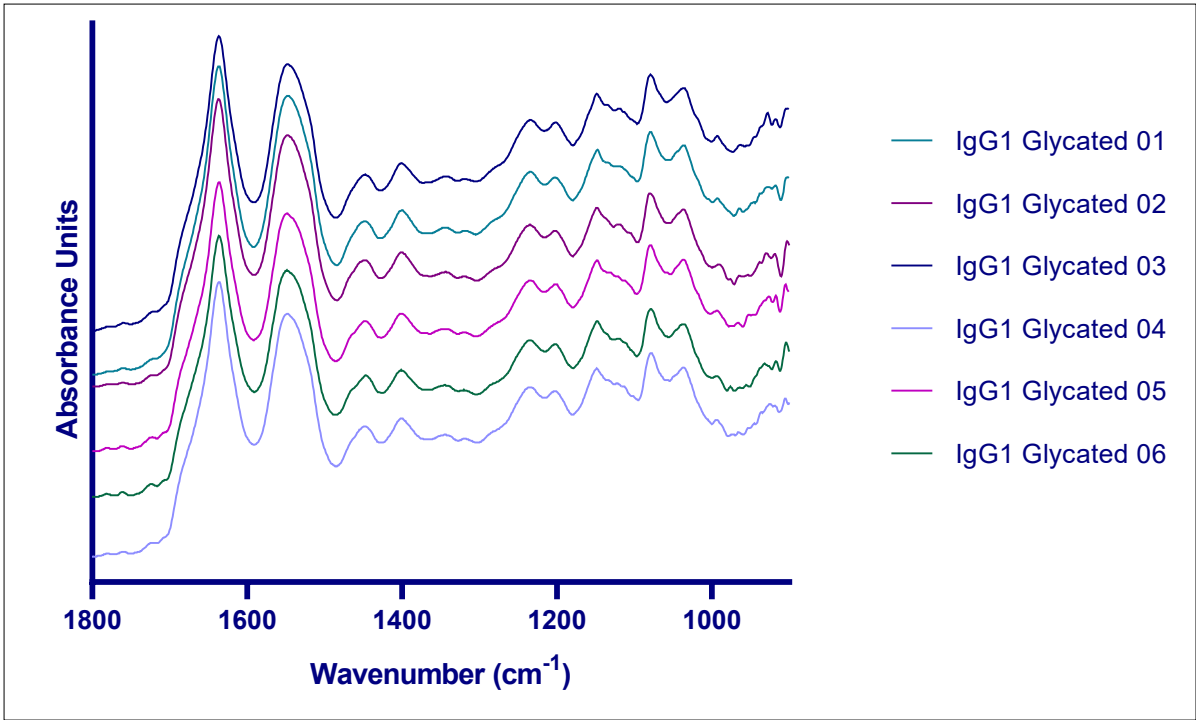

*Figure 3 Repeatability assessment of FT-IR measurements of IgG1 glycation showing consistent spectra across repeated acquisitions.*

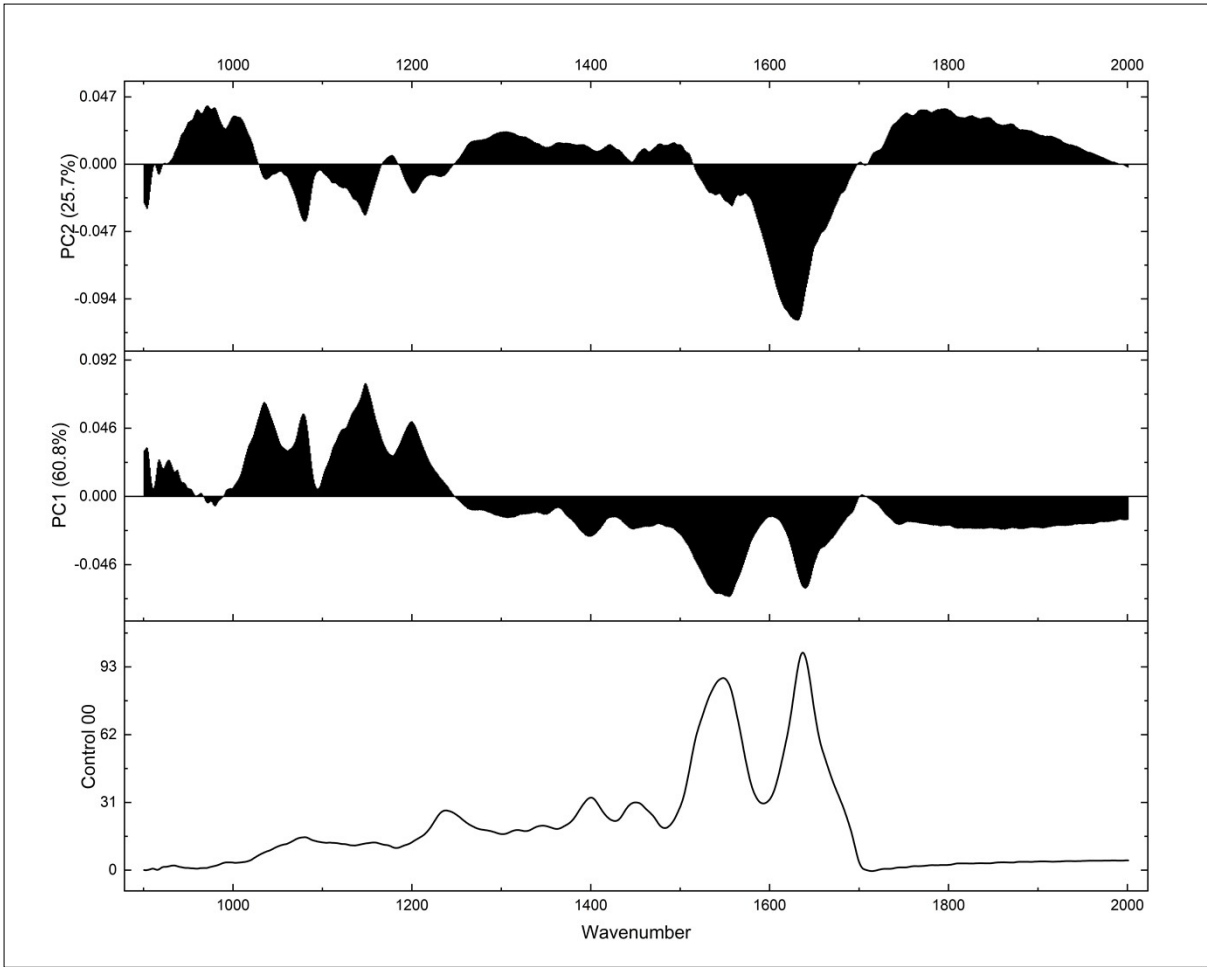

Figure 4: PCA loading plots (PC1 and PC2) correlated with the reference FT-IR spectrum of IgG1 samples, highlighting the spectral regions contributing to sample differentiation.

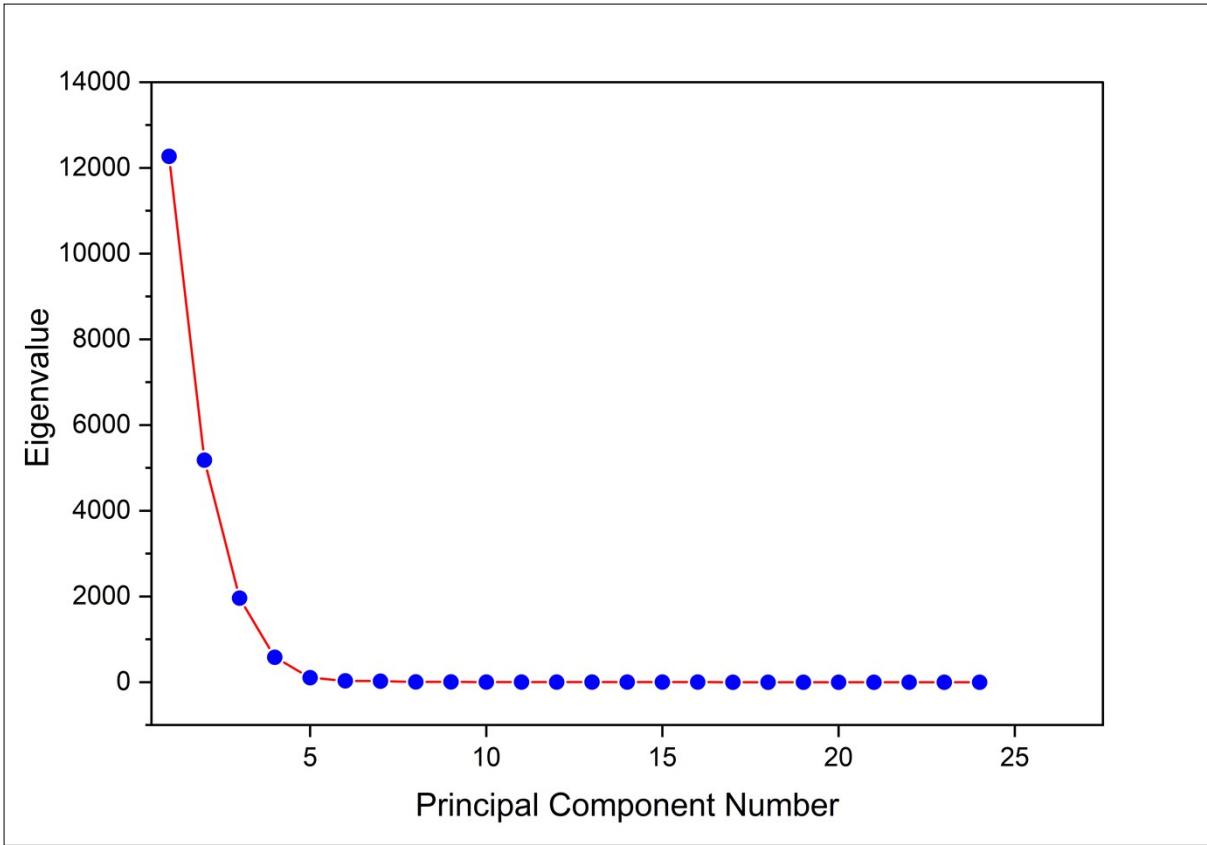

Figure 5: Scree plot illustrating the variance explained by principal component obtained from PCA analysis of FT-IR spectra of non-stressed and stressed IgG1 samples.
